# Supplementary material for: Pressure confinement effect in MoS2monolayers
Source: Royal Society of Chemistry journal article supplement (doi:10.1039/c5nr00580a), 2015-01-01
Supplement: c5nr00580a1.pdf [file c5nr00580a1.pdf]

## Supporting Information

### Pressure confinement effect in MoS<sub>2</sub> monolayers

Fangfei Li<sup>1</sup>, Yalan Yan<sup>1</sup>, Bo Han<sup>1</sup>, Liang Li<sup>1</sup>, Xiaoli Huang<sup>1</sup>, Mingguang Yao<sup>1</sup>, Yuanbo Gong<sup>1</sup>, Xilian Jin<sup>1</sup>, Baoli Liu<sup>2</sup>, Chuanrui Zhu<sup>2</sup>, Qiang Zhou<sup>1\*</sup> and Tian Cui<sup>1</sup>

State Key Laboratory of Superhard Materials, College of Physics, Jilin University, No. 2699  
Qianjin Street, Changchun 130012, P.R. China.

Beijing National Laboratory for Condensed Matter Physics, Institute of Physics, Chinese  
Academy of Sciences, Beijing 100190, P.R. China

E-mail: zhouqiang@jlu.edu.cn

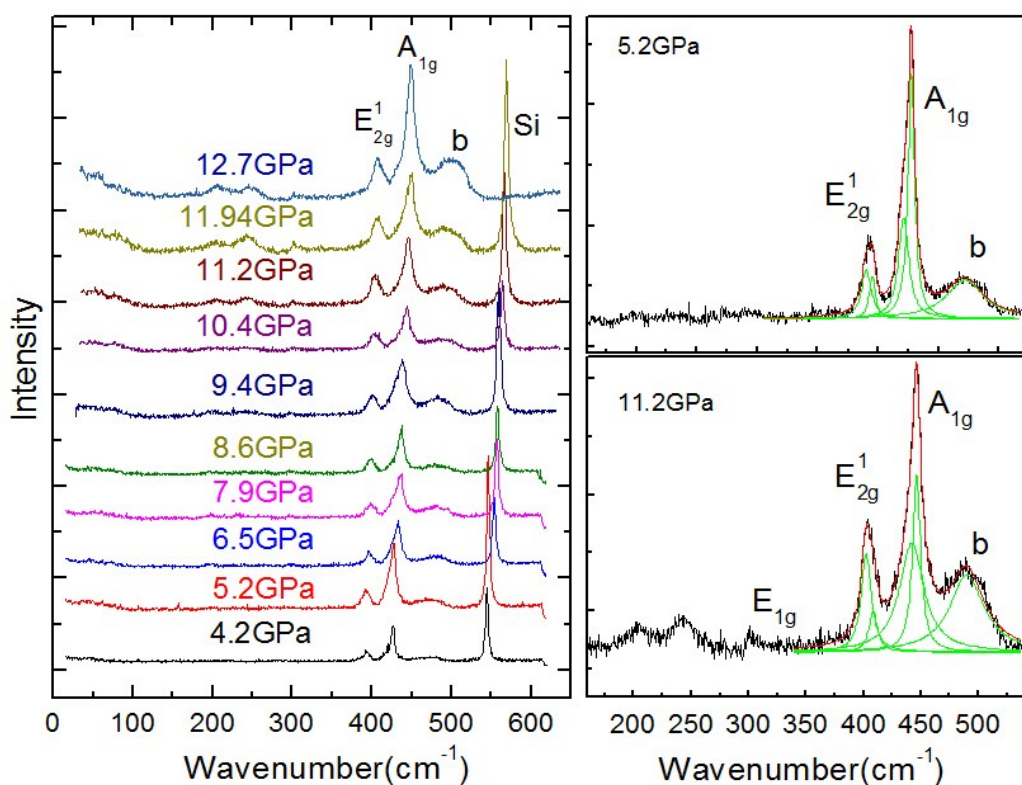

**Fig. S1** High pressure Raman of Exfoliated monolayer

High pressure Raman spectra of exfoliated monolayer(2<sup>nd</sup> sample), liquid Ar was used as the pressure transmitting medium, and Ar is sealed at a initial pressure of 4.2GPa.

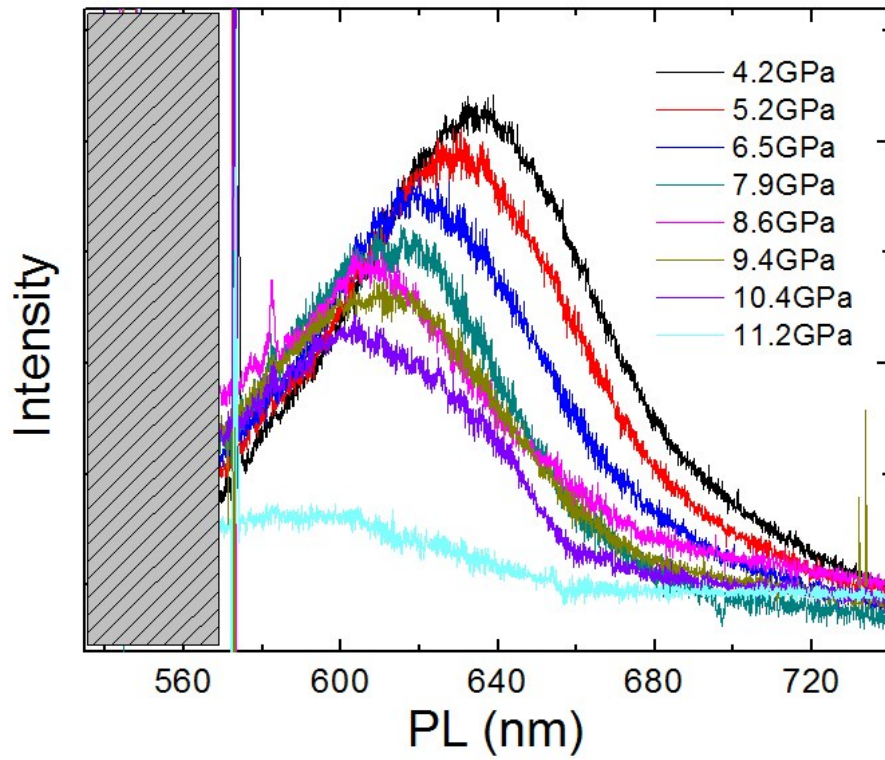

**Fig. S2** High pressure PL spectra of exfoliated monolayer

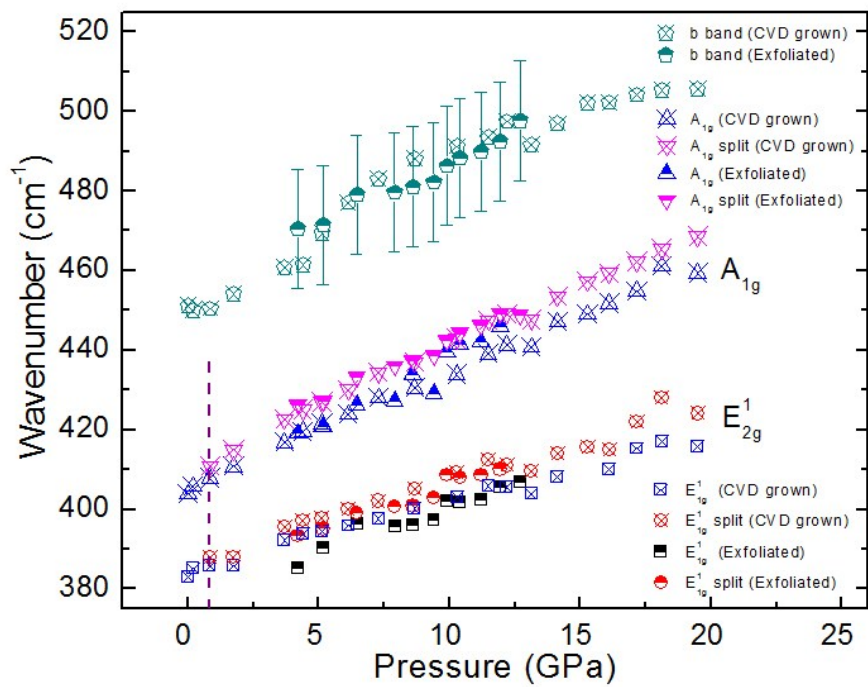

**Fig. S3** Pressure dependence of Raman frequency for different Raman modes from the samples studied in this work.

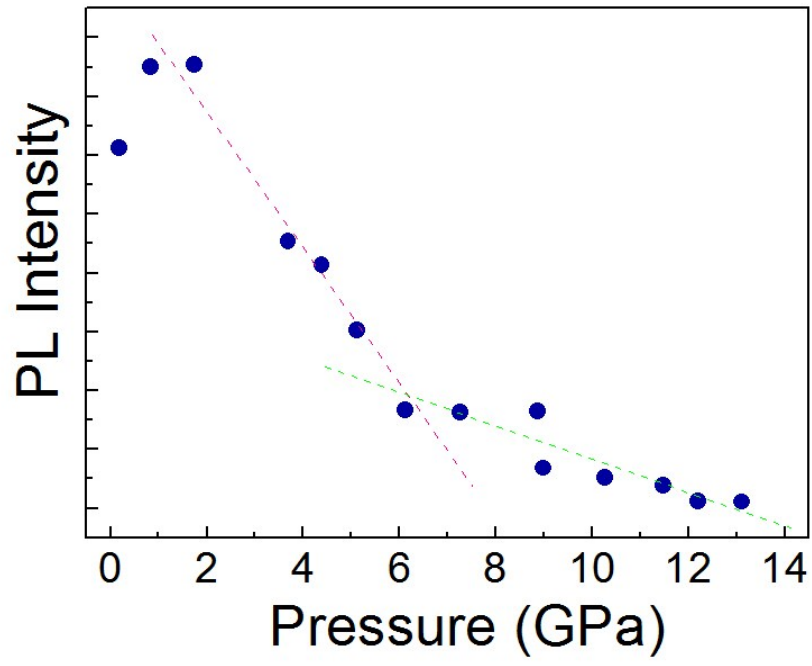

**Fig. S4** Pressure dependence of PL intensity of CVD grown monolayer MoS<sub>2</sub>.
